# Supplementary material for: Clinical Findings and Evaluation of Newborns Who Were Anonymously Surrendered
Source: PubMed Central journal article supplement (PMC10762573; doi:10.1001/jamanetworkopen.2023.49853), 2024-01-02
Supplement: jamanetwopen-e2349853-s001.pdf [file jamanetwopen-e2349853-s001.pdf]

## Data Sharing Statement

Liepmann. Clinical Findings and Evaluation of Newborns Who Were Anonymously Surrendered. *JAMA Netw Open*. Published January 02, 2024.

doi:10.1001/jamanetworkopen.2023.49853

### Data

**Data available:** No

### Additional Information

**Explanation for why data not available:** We are unable to share individual data given ethical and privacy concerns. Specifically, given this small and unique cohort there may be potential for identification based on limited characteristics.
